# Supplementary material for: Sudden Unexplained Nocturnal Death Syndrome: The Hundred Years' Enigma
Source: PubMed Central journal article supplement — J Am Heart Assoc. 2018 Mar 3;7(5):e007837. doi: 10.1161/JAHA.117.007837 (PMC5866328; doi:10.1161/jaha.117.007837), 2018-03-03
Supplement: JAH3-7-e007837-s001.pdf [file JAH3-7-e007837-s001.pdf]

# **SUPPLEMENTAL MATERIAL**

**Table S1. SNPs with significant difference in genotype and allele frequencies.**

| Gene                   | Region   | mRNA      | AA change | dbSNP       | Type of variant | OR    | Prior allele in SUNDS | Ref |
|------------------------|----------|-----------|-----------|-------------|-----------------|-------|-----------------------|-----|
| SCN5A<br>(NM_198056.2) | Intron 9 | C1141-3>A | -         | rs41312433  | Intron          | 0.367 | C                     | (1) |
|                        | Exon 18  | C3269>T   | P1090L    | rs1805125   | Missense        | 0.211 | C                     | (1) |
| SCN10A<br>(NM_006514)  | Exon16   | A2884>G   | I962V     | rs57326399  | Missense        | 1.551 | G                     | (2) |
| VCL<br>(NM_014000.2)   | Exon17   | G2521>C   | D841H     | rs150385900 | Missense        | 5.226 | C                     | (3) |
| NOS1AP                 | 5' UTR   | -         | -         | rs12567209  | -               | 0.656 | G                     | (4) |

AA = amino acid, OR = odds ratio. Ref = references

**Table S2. Mutation/rare variants detected in SUNDS\*:**

| Gene                   | Genomic region | mRNA    | AA change | Protein region | Rate  | dbSNP       | Type of variant | Category† | ACMG definition | Ref  |
|------------------------|----------------|---------|-----------|----------------|-------|-------------|-----------------|-----------|-----------------|------|
| SCN5A<br>(NM_198056.2) | Exon3          | G283>A  | V95I      | N-terminus     | 1/123 | rs199473054 | Missense        | RV        | VUS             | [1]  |
|                        | Exon3          | G362>A  | R121Q     | C-terminus     | 2/123 | rs199473058 | Missense        | RV        | LP              | [1]  |
|                        | Exon9          | G1100>A | R367H     | DIS5-S6        | 1/123 | rs28937318  | Missense        | RV        | LP              | [1]  |
|                        | Exon12         | G1538>A | R513H     | DI-DII         | 1/123 | novel       | Missense        | Mutation  | VUS             | [1]  |
|                        | Exon16         | G2608>C | D870H     | DIIS5-S6       | 1/123 | novel       | Missense        | Mutation  | VUS             | [1]  |
|                        | Exon18         | G3292>T | V1098L    | DII-DIII       | 1/123 | rs199473191 | Missense        | RV        | VUS             | [1]  |
|                        | Exon20         | G3604>A | V1202M    | DII-DIII       | 1/123 | -           | Missense        | RV        | VUS             | [1]  |
|                        | Exon23         | G4018>A | V1340I    | DIIS4          | 1/44  | rs199473605 | Missense        | RV        | VUS             | [5]  |
|                        | Exon26         | C4534>T | R1512W    | DIII-DIV       | 1/123 | -           | Missense        | RV        | VUS             | [1]. |

|                               |        |         |        |            |       |             |          |          |     |     |
|-------------------------------|--------|---------|--------|------------|-------|-------------|----------|----------|-----|-----|
|                               | Exon28 | T5291>A | V1764D | DIVS6      | 1/123 | novel       | Missense | Mutation | VUS | [1] |
|                               | Exon28 | C5810>T | S1937F | C-terminus | 1/123 | novel       | Missense | Mutation | VUS | [1] |
| SCN1B<br>(NM_001037.4)        | Exon3  | G412>A  | V138I  | N-terminus | 3/123 | rs72558029  | Missense | RV       | VUS | [1] |
|                               | Exon4  | C566>T  | T189M  | C-terminus | 2/123 | rs2305748   | Missense | RV       | VUS | [1] |
| SCN3B<br>(NM_00104015<br>1.1) | Exon4  | G583>A  | A195T  | C-terminus | 1/123 | rs375755770 | Missense | RV       | VUS | [1] |
| SCN10A<br>(NM_006514)         | Exon1  | G 41>A  | R14H   | N-terminus | 1/105 | rs141207048 | Missense | RV       | VUS | [2] |
|                               | Exon9  | T1157>G | F386C  | DIS6       | 1/105 | rs78555408  | Missense | RV       | VUS | [2] |
|                               | Exon15 | G450>A  | R817Q  | DIIS5-S6   | 1/105 | rs201068959 | Missense | RV       | VUS | [2] |
|                               | Exon20 | C3542>T | T1181M | DIIS1-S2   | 1/105 | rs150773437 | Missense | RV       | VUS | [2] |
|                               | Exon21 | C3787>T | R1263* | DIIS4      | 1/105 | novel       | Nonsense | Mutation | LP  | [2] |

|                          |           |               |              |               |       |             |                           |          |     |     |
|--------------------------|-----------|---------------|--------------|---------------|-------|-------------|---------------------------|----------|-----|-----|
| KCNQ1<br>(NM_000218.2)   | Intron 8  | 1128+5G>A     | -            | -             | 1/44  | rs76735093  | Intron                    | RV       | VUS | [5] |
|                          | Exon16    | 1876_1893del  | G626_P631del | C-terminus    | 1/44  | novel       | Deletion                  | Mutation | LP  | [5] |
| KCNH2<br>(NM_000238.3)   | Intron 5  | 1128 + 6C > T | -            | -             | 1/108 | novel       | Intron                    | Mutation | VUS | [6] |
|                          | Intron 11 | 2692 + 8G > A | -            | -             | 1/104 | novel       | Intron                    | Mutation | VUS | [6] |
|                          | Exon 13   | A3110>T       | D1037V       | C-terminus    | 1/44  | novel       | Missense                  | Mutation | VUS | [5] |
| KCNE1<br>(NM_000219.4)   | Exon 3    | T160 > G      | F54V         | Transmembrane | 1/105 | novel       | Missense                  | Mutation | VUS | [6] |
| KCNE2<br>(NM_172201.1)   | Exon 2    | T370 > C      | *124R        | C-terminus    | 1/104 | Novel       | Terminator codon mutation | Mutation | LP  | [6] |
| KCNJ5<br>(NM_000890.3)   | Exon 3    | A536>G        | N179S        | -             | 1/44  | rs147070381 | Missense                  | RV       | VUS | [5] |
| CACNA1C<br>(NM_000719.6) | Exon 37   | T4393>C       | F1465L       | DIVS5-S6      | 1/44  | rs886038809 | Missense                  | RV       | VUS | [5] |
|                          | Exon 44   | C5329>T       | R1777C       | C-terminus    | 1/44  | rs775251529 | Missense                  | RV       | VUS | [5] |

|                         |         |         |        |   |       |             |          |          |     |      |
|-------------------------|---------|---------|--------|---|-------|-------------|----------|----------|-----|------|
| CACNB2<br>(NM_201590.2) | Exon 14 | C1354>T | R452C  | - | 1/44  | rs111250176 | Missense | RV       | VUS | [5]  |
| PKP2<br>(NM_004572.3)   | Exon 3  | G475>A  | A159T  | - | 1/100 | novel       | Missense | Mutation | VUS | [7]  |
|                         | Exon 3  | G794>A  | G265E  | - |       | novel       | Missense | Mutation | VUS | [7]  |
| DSP<br>(NM_004415.2)    | Exon 2  | A269>G  | Q90R   | - | 1/40  | rs188516326 | Missense | RV       | VUS | [8]  |
|                         | Exon 3  | A373>T  | I125F  | - | 1/40  | novel       | Missense | Mutation | VUS | [8]  |
|                         | Exon 12 | A1562>C | D521A  | - | 1/40  | rs748790273 | Missense | RV       | VUS | [8]  |
|                         | Exon 23 | G4071>C | E1357D | - | 1/40  | rs569786610 | Missense | RV       | VUS | [8]  |
|                         | Exon 24 | G7735>C | D2579H | - | 1/40  | rs750744914 | Missense | RV       | VUS | [8]  |
| GJA1<br>(NM_000165.4)   | Exon 2  | C169>T  | Q57*   | - | 1/124 | novel       | Nonsense | Mutation | LP  | [9]  |
| VCL<br>(NM_014000.2)    | Exon 3  | G282>A  | M94I   | - | 1/44  | rs774870551 | Missense | RV       | VUS | [10] |

|                         |         |          |           |   |       |             |           |          |     |      |
|-------------------------|---------|----------|-----------|---|-------|-------------|-----------|----------|-----|------|
| LRRC10<br>(NM_201550.3) | 5' UTR  | -2G>T    | Noncoding | - | 1/88  | rs762951776 | Noncoding | Mutation | VUS | [11] |
|                         | Exon 1  | C206>T   | P69L      | - | 1/88  | rs140389574 | Missense  | RV       | VUS | [11] |
|                         | Exon 1  | G385>A   | E129K     | - | 1/113 | rs762144273 | Missense  | Mutation | VUS | [11] |
| ABCC9<br>(NM_020297.2)  | Exon 29 | C3589>T  | R197C     | - | 1/44  | rs778849288 | Missense  | RV       | VUS | [5]  |
| ACTN2<br>(NM_001103.2)  | Exon 13 | T1162>A  | W388R     | - | 2/44  | -           | Missense  | RV       | VUS | [5]  |
| AKAP9<br>(NM_005751.4)  | Exon 46 | G11135>A | R3712Q    | - | 1/44  | rs186148498 | Missense  | RV       | VUS | [5]  |
|                         | Exon 9  | A1642>G  | R548G     | - | 1/44  | rs147247719 | Missense  | RV       | VUS | [5]  |
| ANKRD<br>(NM_014391.2)  | Exon5   | G545>A   | R182H     | - | 1/44  | rs530739375 | Missense  | RV       | VUS | [5]  |
| DMPK<br>(NM_004409.3)   | Exon15  | C1868>T  | P623L     | - | 1/44  | rs200199039 | Missense  | RV       | VUS | [5]  |
| EYA4<br>(NM_004100.4)   | Exon 18 | A1622>T  | N541I     | - | 1/44  | -           | Missense  | Mutation | VUS | [5]  |

|                          |         |         |        |   |      |             |          |          |     |     |
|--------------------------|---------|---------|--------|---|------|-------------|----------|----------|-----|-----|
| GATA4<br>(NM_002052.3)   | Exon 4  | G544>C  | G182R  | - | 2/44 | -           | Missense | Mutation | VUS | [5] |
| JUP<br>(NM_002230.2)     | Exon 6  | C958>T  | R320C  | - | 1/44 | rs200740462 | Missense | RV       | VUS | [5] |
| LDB3<br>(NM_001171610.1) | Exon 10 | T1333>C | S445P  | - | 1/44 | rs868594949 | Missense | RV       | VUS | [5] |
|                          | Exon 10 | C1457>G | P486R  | - | 1/44 | rs12761754  | Missense | RV       | VUS | [5] |
| LMNA<br>(NM_170707.3)    | Exon 12 | C1718>T | S573L  | - | 1/44 | rs60890628  | Missense | RV       | VUS | [5] |
| MYBPC3<br>(NM_000256.3)  | Exon 2  | G104>A  | R35Q   | - | 1/44 | rs397515885 | Missense | RV       | VUS | [5] |
|                          | Exon 7  | G787>A  | G263R  | - | 1/44 | rs373730381 | Missense | RV       | VUS | [5] |
|                          | Exon 32 | C3579>G | I1193M | - | 1/44 | novel       | Missense | Mutation | VUS | [5] |
| MYH6<br>(NM_002471.3)    | Exon 13 | C1154>T | S385L  | - | 1/44 | rs778319108 | Missense | RV       | VUS | [5] |
|                          | Exon 30 | G4207>A | E1403K | - | 1/44 | rs769398160 | Missense | RV       | VUS | [5] |



|                         |         |         |        |   |       |             |          |          |     |     |
|-------------------------|---------|---------|--------|---|-------|-------------|----------|----------|-----|-----|
|                         | Exon 31 | C4504>T | R1502W | - | 1/44  | -           | Missense | RV       | VUS | [5] |
| MYH7<br>(NM_000257.2)   | Exon 25 | C3235>T | R1079W | - | 1/44  | rs192722540 | Missense | RV       | VUS | [5] |
|                         | Exon 27 | G3341>A | R1114H | - | 1/44  | rs730880773 | Missense | Mutation | VUS | [5] |
| NUP155<br>(NM_153485.1) | Exon 13 | C1507>T | L503F  | - | 1/44  | rs758699546 | Missense | RV       | VUS | [5] |
| SGCD<br>(NM_000337.5)   | Exon 8  | A848>G  | Q283R  | - | 1//44 | rs397516338 | Missense | RV       | VUS | [5] |
| TNNT2<br>(NM_000364.2)  | Exon 16 | C877>T  | R293C  | - | 1/44  | -           | Missense | RV       | VUS | [5] |

\*Only nonsynonymous and splice site rare variants with a MAF <0.01 in the East Asian (EAS, 4327 and 9345 individuals respectively) in Exome Aggregation Consortium (ExAC) and Genome Aggregation Database (gnomAD).

† Category: mutation: absent in controls and public database; RV = Rare variants.

LP = likely pathogenic, VUS = uncertain significance. Ref = references.

### Supplemental References:

1. Liu C, Tester DJ, Hou Y, Wang W, Lv G, Ackerman MJ, Makielski JC, Cheng J. Is sudden unexplained nocturnal death syndrome in Southern China a cardiac sodium channel dysfunction disorder? *Forensic Sci Int.* 2014; 236:38-45.
2. Zhang L, Zhou F, Huang L, Wu Q, Zheng J, Wu Y, Yin K, Cheng J. Association of common and rare variants of SCN10A gene with sudden unexplained nocturnal death syndrome in Chinese Han population. *Int J Legal Med.* 2017; 131: 53-60.
3. Cheng J, Kyle JW, Lang D, Wiedmeyer B, Guo J, Yin K, Huang L, Vaidyanathan R, Su T, Makielski JC. An East Asian Common Variant Vinculin P.Asp841His Was Associated With Sudden Unexplained Nocturnal Death Syndrome in the Chinese Han Population. *J Am Heart Assoc.* 2017; 6:005330. doi:10.1161/JAHA.116.005330.
4. Huang L, Yu Y, Chen Y, Tester DJ, Tang S, Ackerman MJ, Yuan Z, Cheng J. Association of common variants in NOS1AP gene with sudden unexplained nocturnal death syndrome in the southern Chinese Han population. *Int J Legal Med.* 2014; 128: 933-8.
5. Zhang L, Tester DJ, Lang D, Chen Y, Zheng J, Gao R, Corliss RF, Tang S, Kyle JW, Liu C, Ackerman MJ, Makielski JC, Cheng J. Does Sudden Unexplained Nocturnal Death Syndrome Remain the Autopsy-Negative Disorder: A Gross, Microscopic, and Molecular Autopsy Investigation in Southern China. *Mayo Clin Proc.* 2016;91:1503-1514.
6. Liu C, Zhao Q, Su T, Tang S, Lv G, Liu H, Quan L, Cheng J. Postmortem molecular analysis of KCNQ1, KCNH2, KCNE1 and KCNE2 genes in sudden unexplained nocturnal death syndrome in the Chinese Han population. *Forensic Sci Int.* 2013;231:82-7.
7. Huang L, Tang S, Peng L, Chen Y, Cheng J. Molecular Autopsy of Desmosomal Protein Plakophilin-2 in Sudden Unexplained Nocturnal Death Syndrome. *J Forensic Sci.* 2016;61:687-91.

8. Zhao Q, Chen Y, Peng L, Gao R, Liu N, Jiang P, Liu C, Tang S, Quan L, Makielski JC, Cheng J. Identification of rare variants of DSP gene in sudden unexplained nocturnal death syndrome in the southern Chinese Han population. *Int J Legal Med.* 2016; 130: 317-22.
9. Wu Q, Wu Y, Zhang L, Zheng J, Tang S, Cheng J. GJA1 gene variations in sudden unexplained nocturnal death syndrome in the Chinese Han population. *Forensic Sci Int.* 2017;270: 178-182.
10. Cheng J, Kyle J, Wiedmeyer B, Lang D, Vaidyanathan R, Makielski J. Vinculin variant M94I identified in sudden unexplained nocturnal death syndrome decreases cardiac sodium current. *Sci Rep.* 2017;7:42953.
11. Huang L, Tang S, Chen Y, Zhang L, Yin K, Wu Y, Zheng J, Wu Q, Makielski JC, Cheng J. Molecular pathological study on LRRC10 in sudden unexplained nocturnal death syndrome in the Chinese Han population. *Int J Legal Med.* 2017;131:621-628.
